# Supplementary material for: Electrical tailoring of the photoluminescence of silicon-vacancy centers in diamond/silicon heterojunctions
Source: Royal Society of Chemistry journal article supplement (doi:10.1039/d2tc01308h), 2022-01-01
Supplement: d2tc01308h1.pdf [file d2tc01308h1.pdf]

## Supplementary Materials

### **Electrical tailoring of the photoluminescence of silicon-vacancy centers in diamond/silicon heterojunctions**

Xiaokun Guo <sup>a,b</sup>, Bing Yang <sup>a,\*</sup>, Jiaqi Lu <sup>a,b</sup>, Haining Li <sup>a,b</sup>, Nan Huang <sup>a</sup>, LuSheng Liu <sup>a</sup>, Xin Jiang <sup>a,c,\*</sup>

<sup>a</sup> *Shenyang National Laboratory for Materials Science, Institute of Metal Research (IMR), Chinese Academy of Sciences (CAS), No. 72 Wenhua Road, Shenyang, 110016, China*

<sup>b</sup> *School of Materials Science and Engineering, University of Science and Technology of China, No. 72 Wenhua Road, Shenyang, 110016, China*

<sup>c</sup> *Institute of Materials Engineering, University of Siegen, Paul-Bonatz-Str. 9-11, Siegen, 57076, Germany*

\*Corresponding author.

E-mail: [byang@imr.ac.cn](mailto:byang@imr.ac.cn) (Bing Yang), [xjiang@imr.ac.cn](mailto:xjiang@imr.ac.cn) (Xin Jiang).

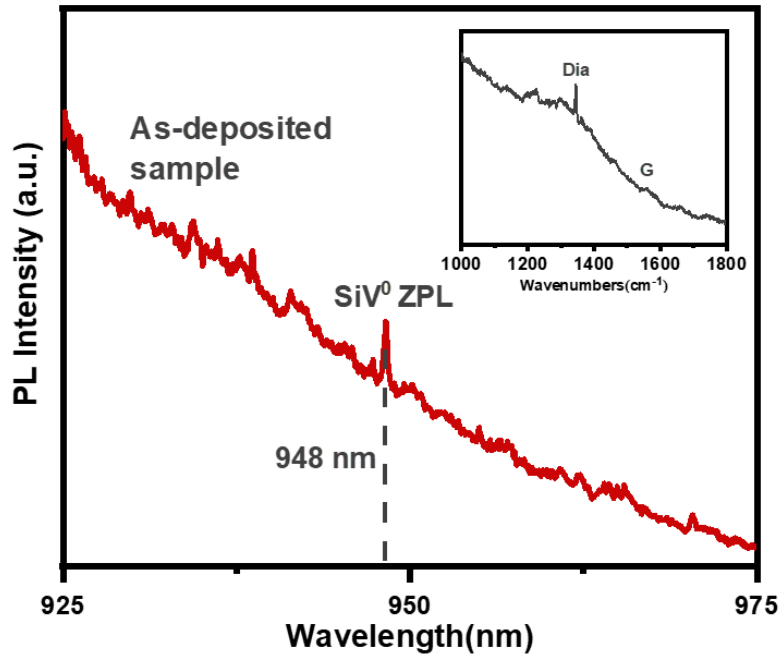

**Figure S1.** The PL spectrum of the as-deposited diamond film excited by a 785 nm laser at liquid nitrogen temperature (77 K). A clear peak located at 948 nm indicates the presence of neutrally-charged  $\text{SiV}^0$  centers. The inset shows the Raman spectra of the diamond film under the same excitation laser.

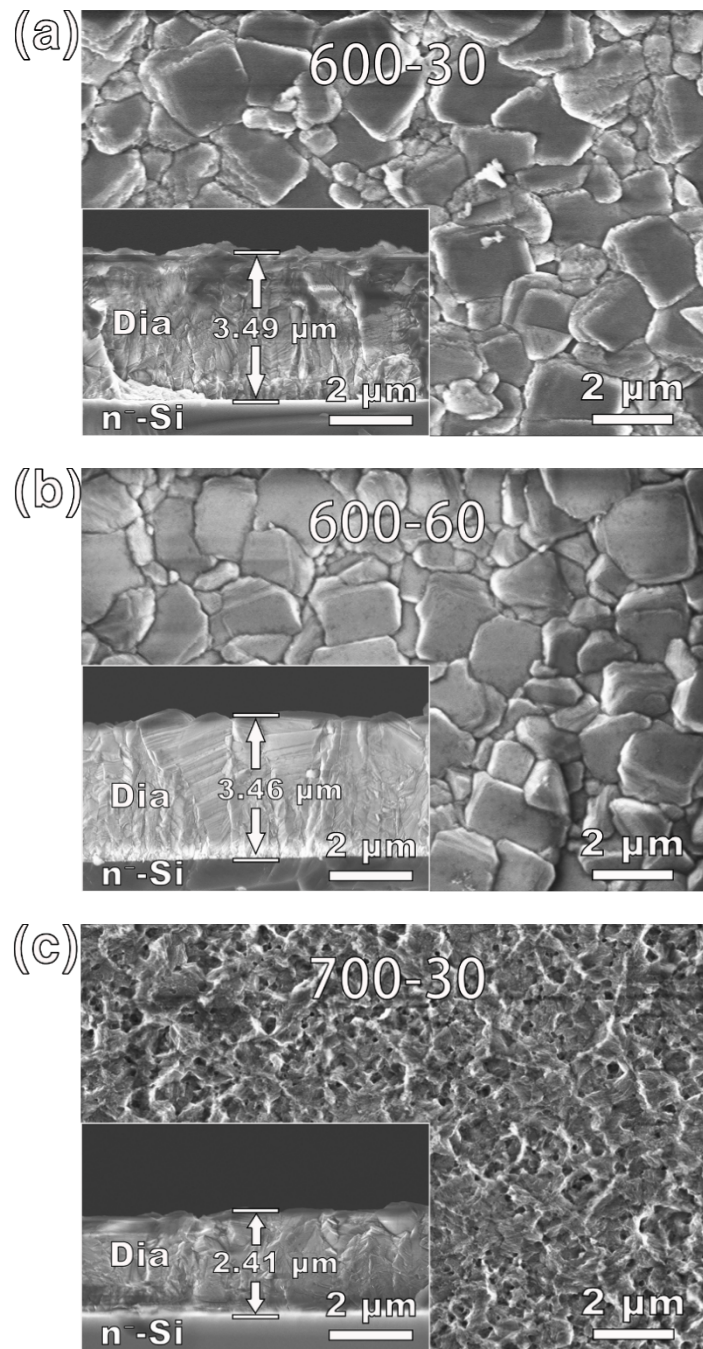

**Figure S2.** The SEM images of the diamond films annealed at various temperatures and durations: (a) 600°C-30 min; (b) 600 °C-60 min; (c) 700 °C-30 min.

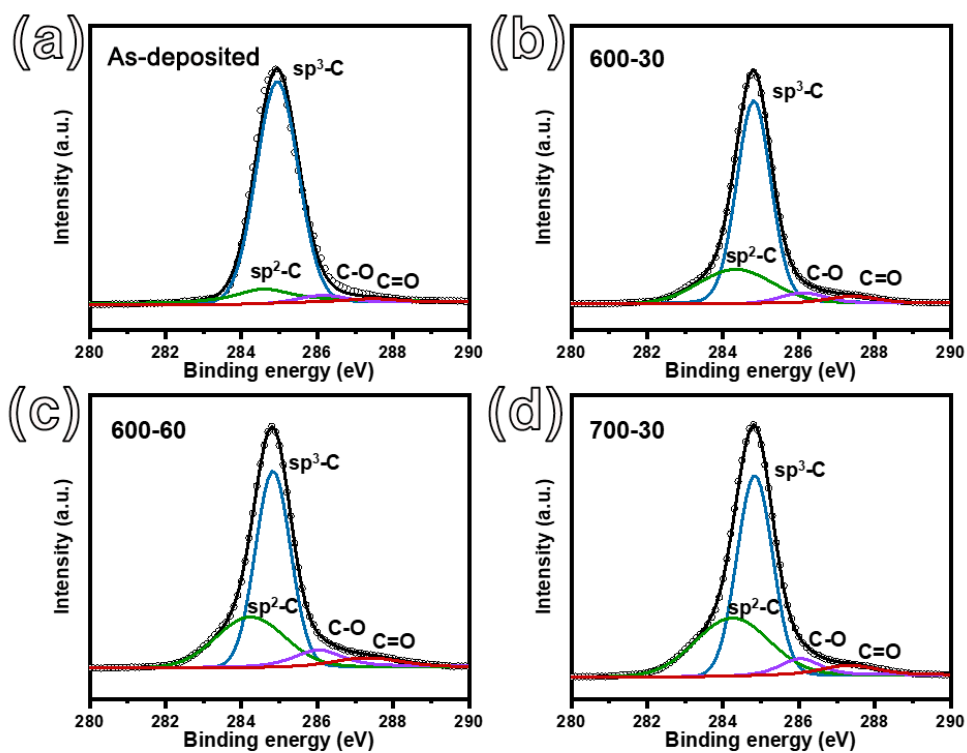

**Figure S3.** XPS spectra of the C1 core carbon of the as-deposited samples before and after air annealing treatment: (a) the as-deposited sample; (b) the 600-30 sample; (c) the 600-60 sample; (d) the 700-30 sample. Due to the insulating nature of diamond, all the spectra are calibrated by aligning the  $sp^3$  C-C peak to the known literature value of 284.8 eV.

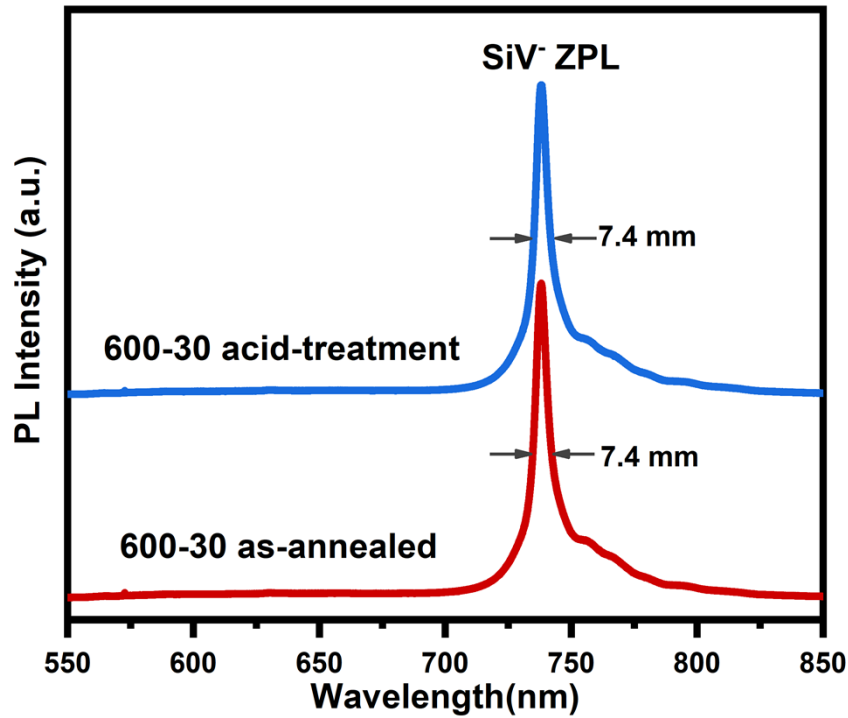

**Figure S4.** The PL spectra of the as-annealed sample before and after acid treatment. In this process, the as-annealed (600-30) sample was soaked in mixed acid ( $\text{H}_2\text{SO}_4$ :  $\text{HNO}_3 = 3:1$ ) at a temperature of  $130^\circ\text{C}$  for 120 min, in order to etch the surface  $\text{sp}^2\text{-C}$  introduced in the annealing process. The PL result clearly shows that the surface graphitization plays a negligible role on the PL intensity of  $\text{SiV}^-$  centers in the whole depth.

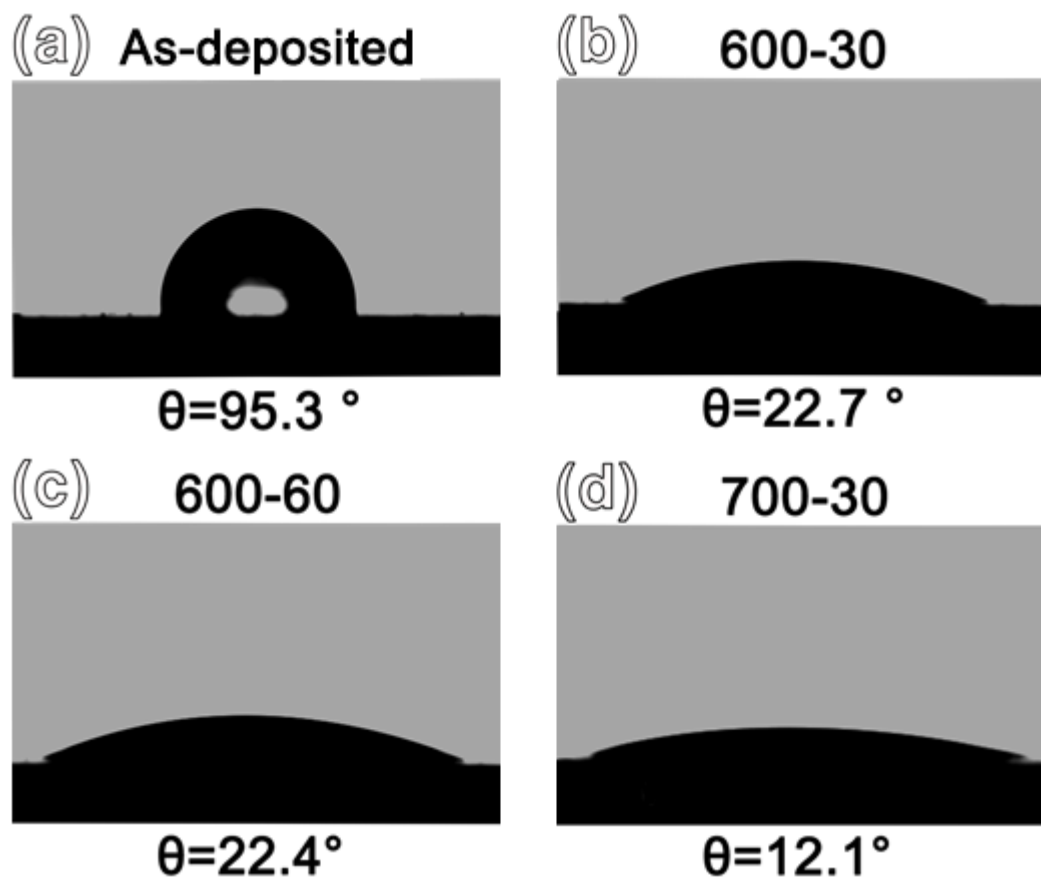

**Figure S5.** The water contact angle of the as-deposited samples before and after air annealing treatment: (a) the as-deposited sample; (b) the 600-30 sample; (c) the 600-60 sample; (d) the 700-30 sample.

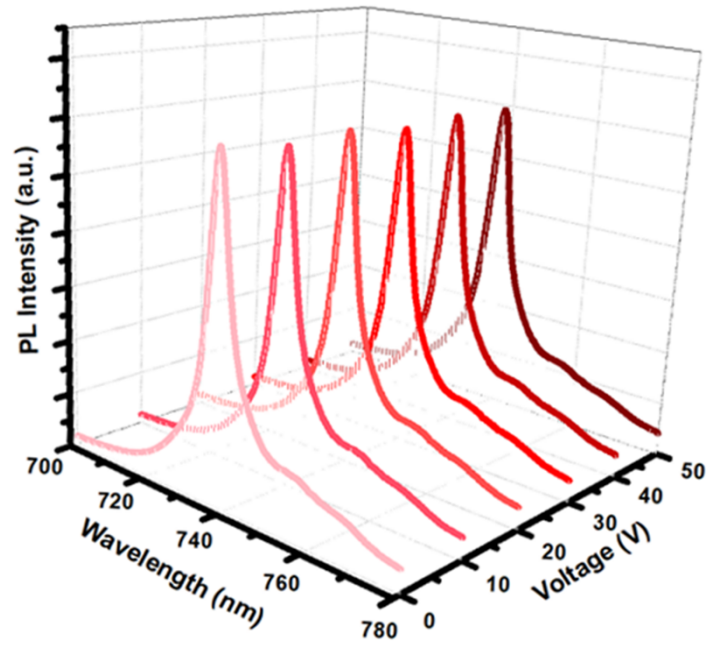

**Figure S6.** The PL signals collected at the region about 2 mm away from the electrodes with applying bias voltages on the diamond/  $n^+$ -Si heterojunction.

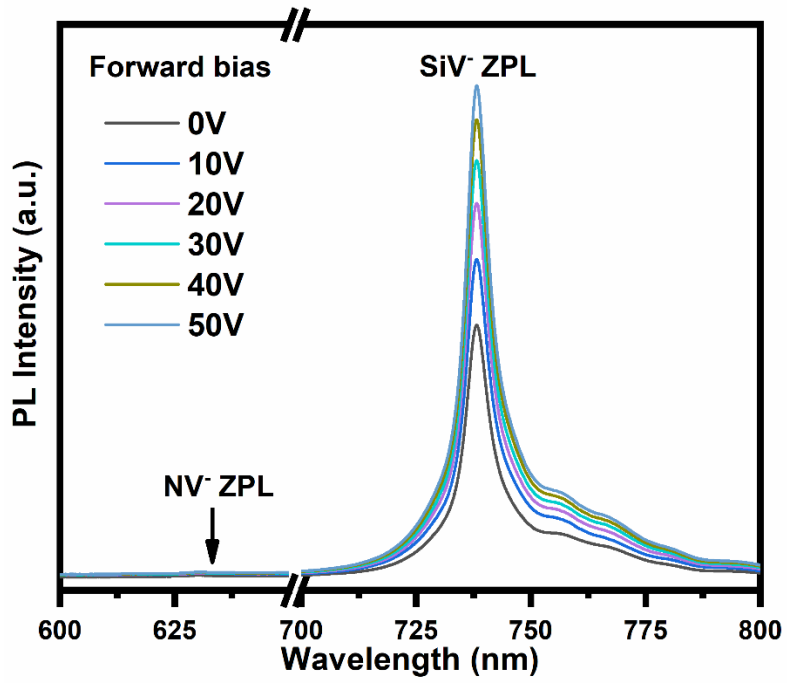

**Figure S7.** The PL spectra of the diamond/ $n^+$ -Si heterojunctions at different forward bias voltages.

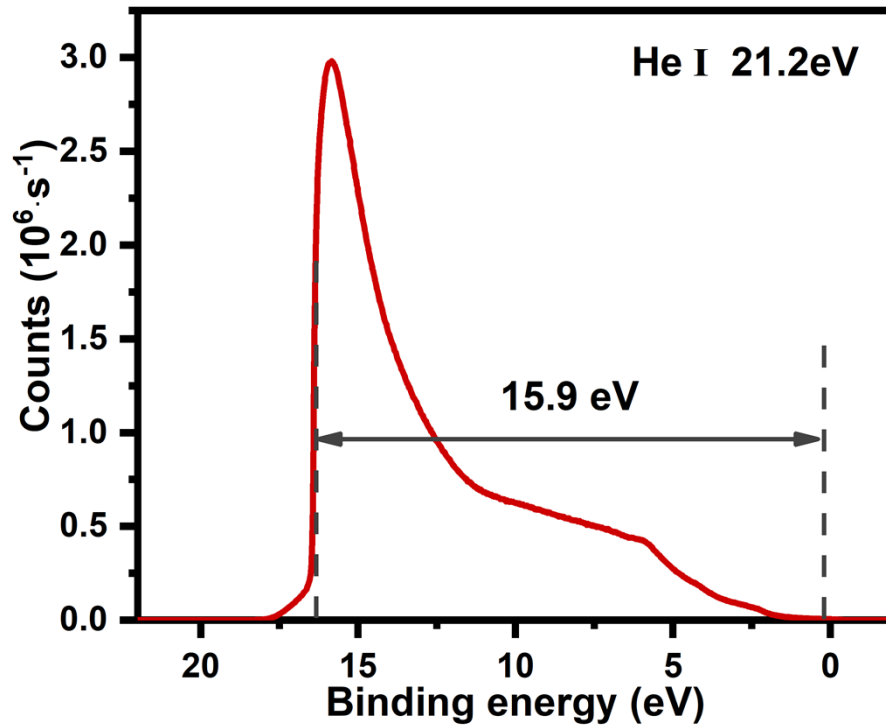

**Figure S8.** UPS valence band spectrum of the as-deposited H-terminated diamond film, exhibiting the energy difference from vacuum level ( $E_{VAC}$ ) to valence band maximum ( $E_V$ ) is estimated to  $21.2 \text{ eV} - 15.9 \text{ eV} = 5.3 \text{ eV}$ . The electron affinity of diamond ( $\chi$ ) was derived by:  $\chi = E_{VAC} - E_C = E_{VAC} - E_V - E_g^{dia} = 5.3 - 5.47 = -0.17 \text{ eV}$ . All energies are measured relative to the common Fermi level that is determined from a reference gold foil.
